# Supplementary material for: Der Querschnittsbereich 14 „Schmerzmedizin“ an der Universität Leipzig – was wurde erreicht?
Source: Springer Nature journal article supplement (doi:10.1007/s00482-022-00665-7), 2022-08-26
Supplement: MOESM1 [file 23421660]

# Online-Zusatzmaterial

## Der QSB 14 „Schmerzmedizin“ an der Universität Leipzig – was wurde erreicht?

### Eine Analyse der Selbsteinschätzung der Studierenden vor, während und fünf Jahre nach Etablierung des Querschnittsbereiches

Gunther Hempel<sup>1</sup>; Andreas Weissenbacher<sup>1</sup>; Diana Becker-Rux<sup>1</sup>; Swantje Mescha<sup>1,2</sup>; Sebastian N. Stehr<sup>1</sup>, Robert Werdehausen<sup>1</sup>

<sup>1</sup> Klinik und Poliklinik für Anästhesiologie und Intensivtherapie; Universitätsklinikum Leipzig AöR; Leipzig, Deutschland

<sup>2</sup> Klinik für Anästhesiologie und Intensivmedizin; Universitätsklinikum Jena; Jena, Deutschland

| Allgemeiner Teil                                                                                                                                                                                     |                          |                          |                          |                          |                          |                          |
|------------------------------------------------------------------------------------------------------------------------------------------------------------------------------------------------------|--------------------------|--------------------------|--------------------------|--------------------------|--------------------------|--------------------------|
|                                                                                                                                                                                                      | trifft gar nicht zu      |                          |                          | trifft völlig zu         |                          | weiß nicht               |
| Der Unterricht zum Thema "Schmerzmedizin" ist derzeit vom Umfang her angemessen.                                                                                                                     | <input type="checkbox"/> | <input type="checkbox"/> | <input type="checkbox"/> | <input type="checkbox"/> | <input type="checkbox"/> | <input type="checkbox"/> |
| Der Unterricht zum Thema "Schmerzmedizin" ist derzeit inhaltlich angemessen.                                                                                                                         | <input type="checkbox"/> | <input type="checkbox"/> | <input type="checkbox"/> | <input type="checkbox"/> | <input type="checkbox"/> | <input type="checkbox"/> |
| Es treten zu viele inhaltliche Überschneidungen mit anderen Veranstaltungen auf (gleiche Themen werden von verschiedenen Abteilungen bearbeitet, z. B. Anästhesie, Innere Medizin, Neurologie, ...). | <input type="checkbox"/> | <input type="checkbox"/> | <input type="checkbox"/> | <input type="checkbox"/> | <input type="checkbox"/> | <input type="checkbox"/> |
| Die Lernziele der von mir besuchten Veranstaltungen zu Thema "Schmerzmedizin" sind mir klar.                                                                                                         | <input type="checkbox"/> | <input type="checkbox"/> | <input type="checkbox"/> | <input type="checkbox"/> | <input type="checkbox"/> | <input type="checkbox"/> |
| Was man zum Thema Schmerzmedizin nach dem Studium wissen sollte, ist mir klar.                                                                                                                       | <input type="checkbox"/> | <input type="checkbox"/> | <input type="checkbox"/> | <input type="checkbox"/> | <input type="checkbox"/> | <input type="checkbox"/> |
| Ich kann das Gelernte für den beruflichen Alltag als Ärztin oder Arzt gut anwenden.                                                                                                                  | <input type="checkbox"/> | <input type="checkbox"/> | <input type="checkbox"/> | <input type="checkbox"/> | <input type="checkbox"/> | <input type="checkbox"/> |
| Auf die Behandlung eines Schmerzpatienten in meiner künftigen Rolle als Ärztin oder Arzt fühle ich mich gut vorbereitet.                                                                             | <input type="checkbox"/> | <input type="checkbox"/> | <input type="checkbox"/> | <input type="checkbox"/> | <input type="checkbox"/> | <input type="checkbox"/> |
| Spezieller Teil                                                                                                                                                                                      |                          |                          |                          |                          |                          |                          |
| Bitte beachten Sie, dass sich die Beschriftung der Skalen im folgenden speziellen Teil vom allgemeinen Teil unterscheidet ("in hohem Maße" links und "überhaupt nicht" rechts).                      |                          |                          |                          |                          |                          |                          |
|                                                                                                                                                                                                      | in hohem Maße            |                          |                          | überhaupt nicht          |                          | weiß nicht               |
| Erhebung einer Schmerzanamnese                                                                                                                                                                       | <input type="checkbox"/> | <input type="checkbox"/> | <input type="checkbox"/> | <input type="checkbox"/> | <input type="checkbox"/> | <input type="checkbox"/> |
| Durchführung einer Schmerz-Symptom-orientierten körperlichen Untersuchung                                                                                                                            | <input type="checkbox"/> | <input type="checkbox"/> | <input type="checkbox"/> | <input type="checkbox"/> | <input type="checkbox"/> | <input type="checkbox"/> |
| Diagnose und Therapie von akuten Schmerzen                                                                                                                                                           | <input type="checkbox"/> | <input type="checkbox"/> | <input type="checkbox"/> | <input type="checkbox"/> | <input type="checkbox"/> | <input type="checkbox"/> |
| Diagnose und Therapie von postoperativen Schmerzen                                                                                                                                                   | <input type="checkbox"/> | <input type="checkbox"/> | <input type="checkbox"/> | <input type="checkbox"/> | <input type="checkbox"/> | <input type="checkbox"/> |
| Diagnose und Therapie von Tumorschmerzen                                                                                                                                                             | <input type="checkbox"/> | <input type="checkbox"/> | <input type="checkbox"/> | <input type="checkbox"/> | <input type="checkbox"/> | <input type="checkbox"/> |
| Diagnose und Therapie von neuropathischen Schmerzen                                                                                                                                                  | <input type="checkbox"/> | <input type="checkbox"/> | <input type="checkbox"/> | <input type="checkbox"/> | <input type="checkbox"/> | <input type="checkbox"/> |
| Diagnose und Therapie von chronifizierten Schmerzen                                                                                                                                                  | <input type="checkbox"/> | <input type="checkbox"/> | <input type="checkbox"/> | <input type="checkbox"/> | <input type="checkbox"/> | <input type="checkbox"/> |
| Diagnose und Therapie von Schmerzen bei Kindern                                                                                                                                                      | <input type="checkbox"/> | <input type="checkbox"/> | <input type="checkbox"/> | <input type="checkbox"/> | <input type="checkbox"/> | <input type="checkbox"/> |
| Komplementärmedizinische Therapieansätze für Schmerzpatienten                                                                                                                                        | <input type="checkbox"/> | <input type="checkbox"/> | <input type="checkbox"/> | <input type="checkbox"/> | <input type="checkbox"/> | <input type="checkbox"/> |
| Psychosomatische Zusammenhänge bei chronischen Schmerzpatienten                                                                                                                                      | <input type="checkbox"/> | <input type="checkbox"/> | <input type="checkbox"/> | <input type="checkbox"/> | <input type="checkbox"/> | <input type="checkbox"/> |
| Durchführung einer BtMVV-konformen Rezeptierung                                                                                                                                                      | <input type="checkbox"/> | <input type="checkbox"/> | <input type="checkbox"/> | <input type="checkbox"/> | <input type="checkbox"/> | <input type="checkbox"/> |
| Erstellung eines Analgesie-Schemas nach WHO-Kriterien                                                                                                                                                | <input type="checkbox"/> | <input type="checkbox"/> | <input type="checkbox"/> | <input type="checkbox"/> | <input type="checkbox"/> | <input type="checkbox"/> |
| Mögliche (unbewusste) Interaktionen und Hilflosigkeitsgefühle gegenüber chronischen Schmerzpatienten                                                                                                 | <input type="checkbox"/> | <input type="checkbox"/> | <input type="checkbox"/> | <input type="checkbox"/> | <input type="checkbox"/> | <input type="checkbox"/> |

Abbildung 1: Übersicht des Fragebogens zur Datenerfassung - Seite 1

| <b>Spezieller Teil [Fortsetzung]</b>                                                                    |                          |                          |                          |                          |                          |                          |
|---------------------------------------------------------------------------------------------------------|--------------------------|--------------------------|--------------------------|--------------------------|--------------------------|--------------------------|
| <b><u>Für wie wichtig halten Sie es, am Ende des Studiums Wissen über folgende Punkte zu haben.</u></b> |                          |                          |                          |                          |                          |                          |
|                                                                                                         | <b>sehr wichtig</b>      |                          |                          |                          | <b>gar nicht wichtig</b> | <b>weiß nicht</b>        |
| Erhebung einer Schmerzanamnese                                                                          | <input type="checkbox"/> | <input type="checkbox"/> | <input type="checkbox"/> | <input type="checkbox"/> | <input type="checkbox"/> | <input type="checkbox"/> |
| Durchführung einer Schmerz-Symptom-orientierten körperlichen Untersuchung                               | <input type="checkbox"/> | <input type="checkbox"/> | <input type="checkbox"/> | <input type="checkbox"/> | <input type="checkbox"/> | <input type="checkbox"/> |
| Diagnose und Therapie von akuten Schmerzen                                                              | <input type="checkbox"/> | <input type="checkbox"/> | <input type="checkbox"/> | <input type="checkbox"/> | <input type="checkbox"/> | <input type="checkbox"/> |
| Diagnose und Therapie von postoperativen Schmerzen                                                      | <input type="checkbox"/> | <input type="checkbox"/> | <input type="checkbox"/> | <input type="checkbox"/> | <input type="checkbox"/> | <input type="checkbox"/> |
| Diagnose und Therapie von Tumorschmerzen                                                                | <input type="checkbox"/> | <input type="checkbox"/> | <input type="checkbox"/> | <input type="checkbox"/> | <input type="checkbox"/> | <input type="checkbox"/> |
| Diagnose und Therapie von neuropathischen Schmerzen                                                     | <input type="checkbox"/> | <input type="checkbox"/> | <input type="checkbox"/> | <input type="checkbox"/> | <input type="checkbox"/> | <input type="checkbox"/> |
| Diagnose und Therapie von chronifizierten Schmerzen                                                     | <input type="checkbox"/> | <input type="checkbox"/> | <input type="checkbox"/> | <input type="checkbox"/> | <input type="checkbox"/> | <input type="checkbox"/> |
| Diagnose und Therapie von Schmerzen bei Kindern                                                         | <input type="checkbox"/> | <input type="checkbox"/> | <input type="checkbox"/> | <input type="checkbox"/> | <input type="checkbox"/> | <input type="checkbox"/> |
| Komplementärmedizinische Therapieansätze für Schmerzpatienten                                           | <input type="checkbox"/> | <input type="checkbox"/> | <input type="checkbox"/> | <input type="checkbox"/> | <input type="checkbox"/> | <input type="checkbox"/> |
| Psychosomatische Zusammenhänge bei chronischen Schmerzpatienten                                         | <input type="checkbox"/> | <input type="checkbox"/> | <input type="checkbox"/> | <input type="checkbox"/> | <input type="checkbox"/> | <input type="checkbox"/> |
| Durchführung einer BtMVV-konformen Rezeptierung                                                         | <input type="checkbox"/> | <input type="checkbox"/> | <input type="checkbox"/> | <input type="checkbox"/> | <input type="checkbox"/> | <input type="checkbox"/> |
| Erstellung eines Analgesie-Schemas nach WHO-Kriterien                                                   | <input type="checkbox"/> | <input type="checkbox"/> | <input type="checkbox"/> | <input type="checkbox"/> | <input type="checkbox"/> | <input type="checkbox"/> |
| Mögliche (unbewusste) Interaktionen und Hilflosigkeitsgefühle gegenüber chronischen Schmerzpatienten    | <input type="checkbox"/> | <input type="checkbox"/> | <input type="checkbox"/> | <input type="checkbox"/> | <input type="checkbox"/> | <input type="checkbox"/> |
| <b>Persönliche Anmerkungen</b>                                                                          |                          |                          |                          |                          |                          |                          |
| Welche Anregungen, Verbesserungsvorschläge und/oder Kritik möchten Sie uns mitteilen?                   |                          |                          |                          |                          |                          |                          |
|                                                                                                         |                          |                          |                          |                          |                          |                          |

Abbildung 2: Übersicht des Fragebogens zur Datenerfassung - Seite 2
